# Supplementary material for: Exome-wide genetic risk score (ExGRS) to predict high myopia across multi-ancestry populations
Source: PubMed Central journal article supplement — Commun Med (Lond). 2024 Dec 30;4:280. doi: 10.1038/s43856-024-00718-1 (PMC11685959; doi:10.1038/s43856-024-00718-1), 2024-12-30
Supplement: 43856_2024_718_MOESM2_ESM.pdf [file 43856_2024_718_MOESM2_ESM.pdf]

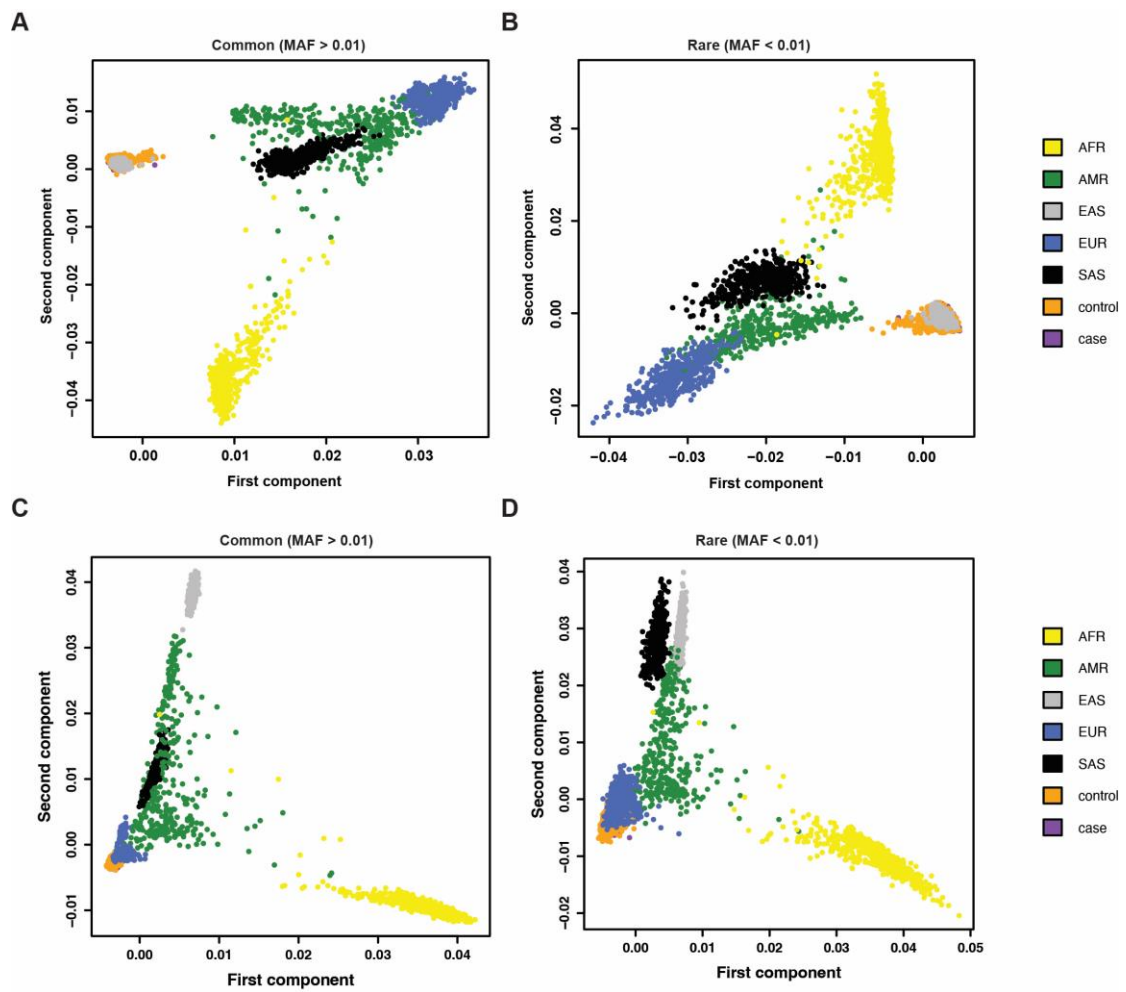

1

2 Supplementary Figure 1. Principal Component Analysis plot of individuals compared to 1000

3 Genomes populations. (A) PCA of MAGIC samples and 1000G populations using common

4 SNPs. (B) PCA of MAGIC samples and 1000G populations using rare SNPs. (C) PCA of

5 UKB samples and 1000G populations using common SNPs. (D) PCA of UKB samples and

6 1000G populations using rare SNPs. AFR, African; AMR, Ad Mixed American; EAS, East

7 Asian; EUR, European; SAS, South Asian.

8

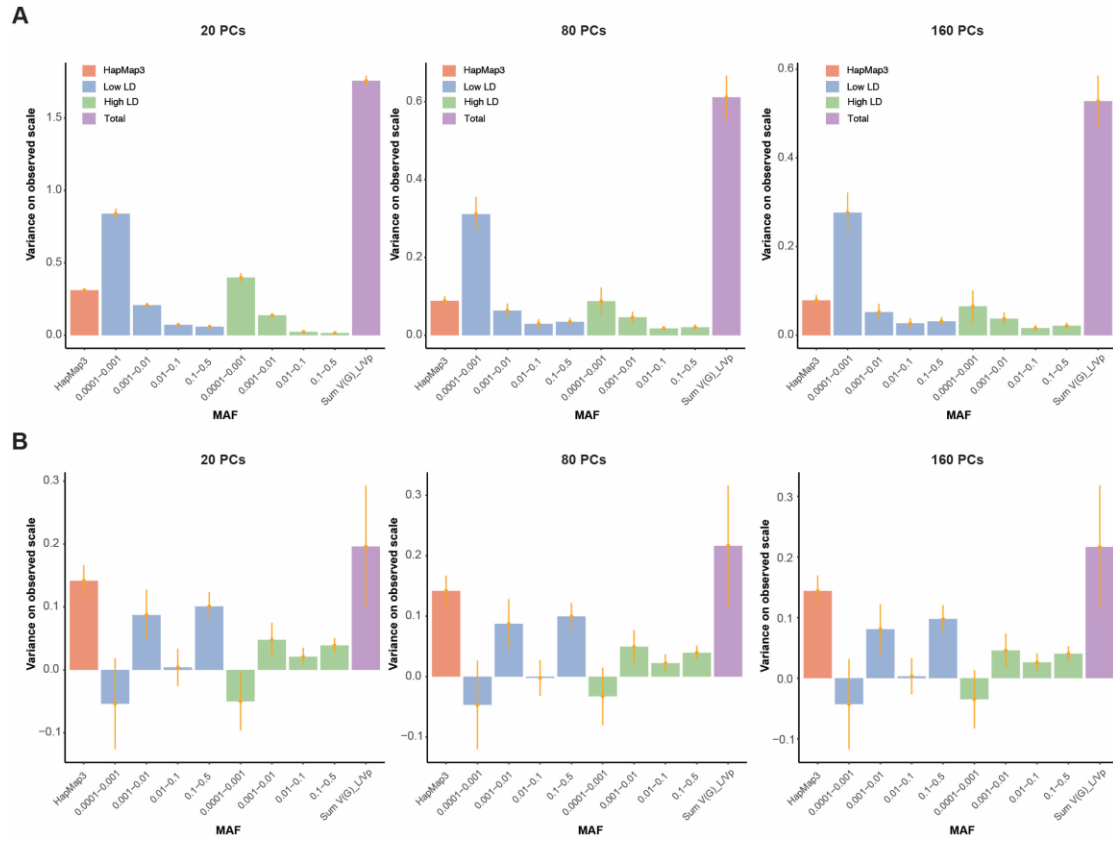

9

10 Supplementary Figure 2. GREML-LDMS estimates from WES data stratified in 8 bins (4

11 MAF bins in 2 LD bins) with correction for 20 PCs (on HM3 SNPs), 80 PCs (10 \* 8 bins) or

12 160 PCs (20 \* 8 bins). (A) Estimates heritability for HM in MAGIC. (B) Estimates

13 heritability for HM in UKB. Error bars indicate standard errors (SE).

14

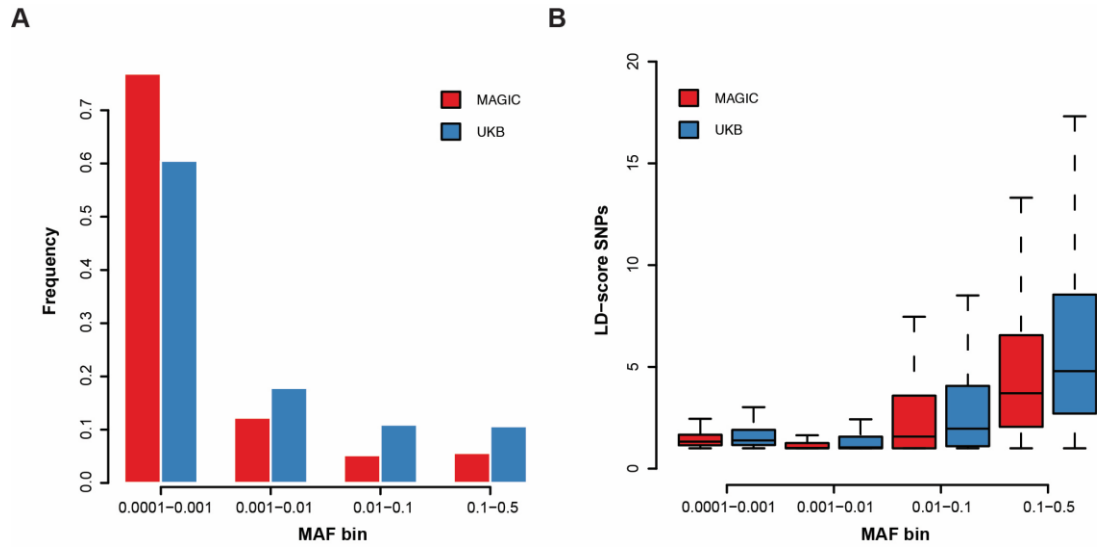

15

16 Supplementary Figure 3. (A) Fraction of the variants as a percentage of the total number of

17 variants in the four MAF bin. (B) Boxplot of the distribution of individual SNPs LD values

18 within each bin. Lower and upper hinges correspond to the first and third quartiles and

19 whiskers extend to  $\pm 1.5 \times$  inter-quartile range.

20

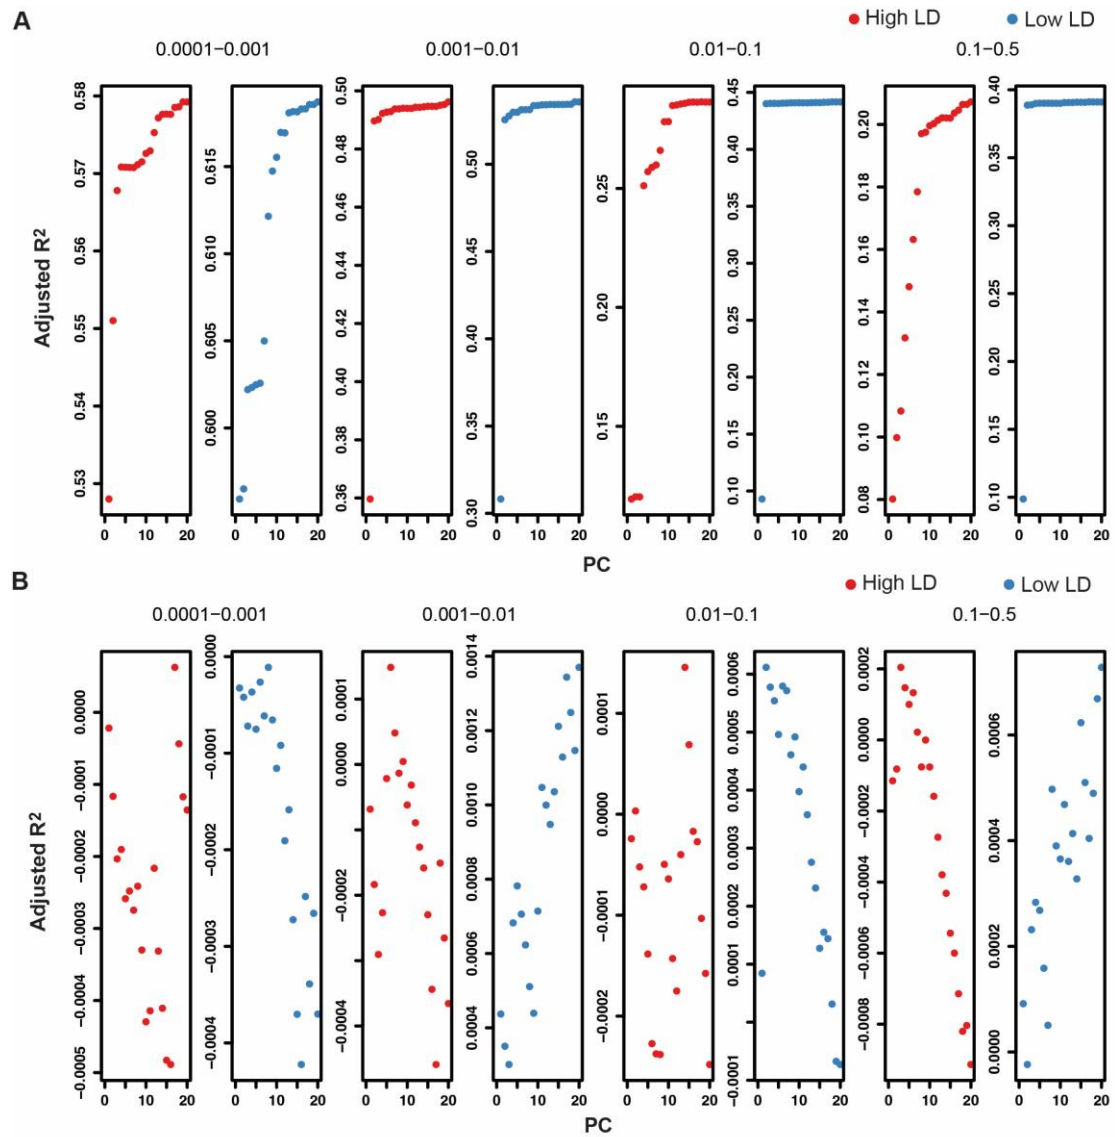

21

22 Supplementary Figure 4. Adjusted R<sup>2</sup> from fitting 20 PCs computemagId from LD-pruned

23 SNPs for different MAF and LD bins. (A) Adjusted R<sup>2</sup> for the 12,000 MAGIC Exome

24 samples. (B) Adjusted R<sup>2</sup> for the N= 8,682 UKB Exome samples.

25

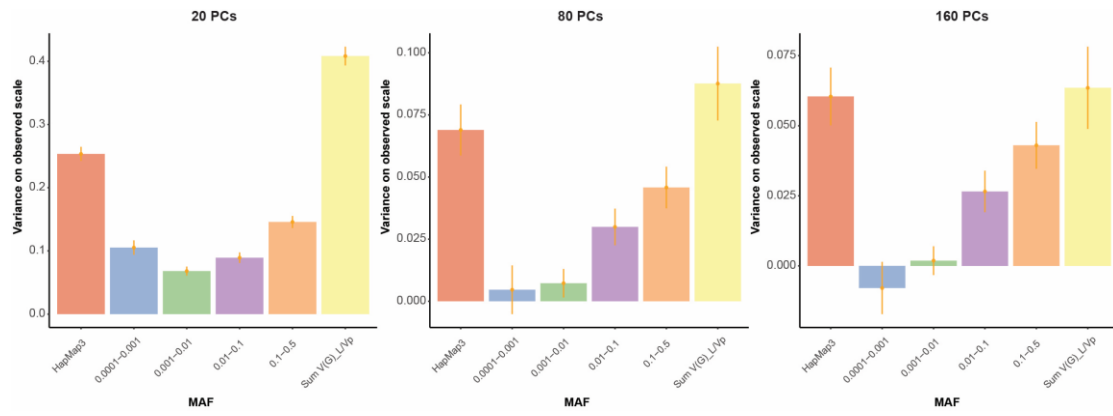

26

27 Supplementary Figure 5. GREML-LDMS estimates for overlapped variant between MAGIC  
 28 and UKB with correction for 20 PCs (on HM3 SNPs), 80 PCs (10 \* 8 bins) or 160 PCs (20 \*  
 29 8 bins).

30

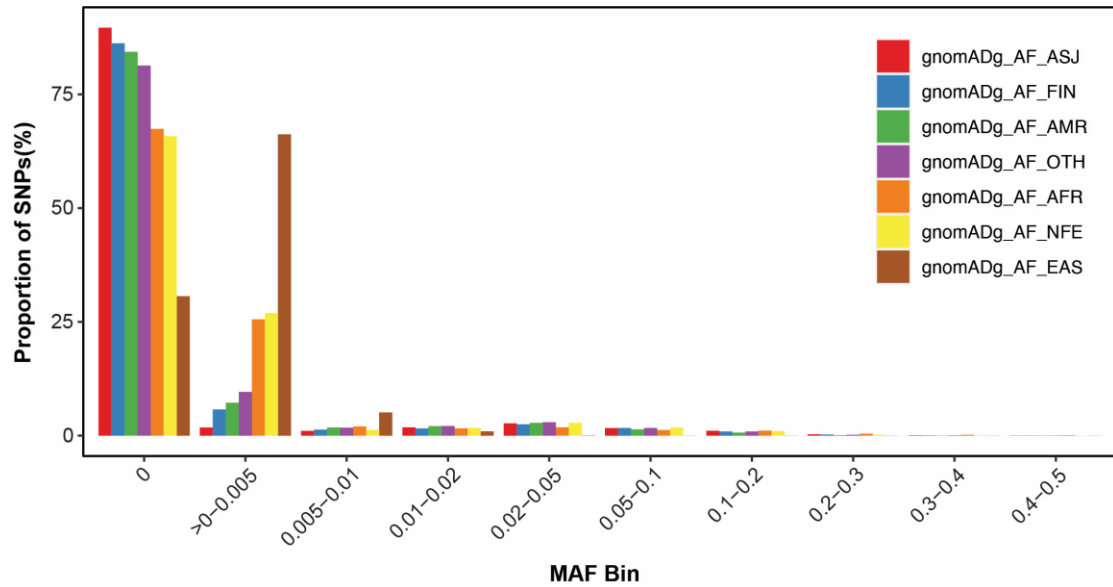

31

32 Supplementary Figure 6. MAF distribution for MAGIC specific rare variants across ancestries

33 in gnomAD. Proportion of polymorphic variants (as a % of total) are described on the y-axis

34 with the x-axis illustrating bins of the minor allele frequencies (MAF) for seven different

35 ancestries.

36

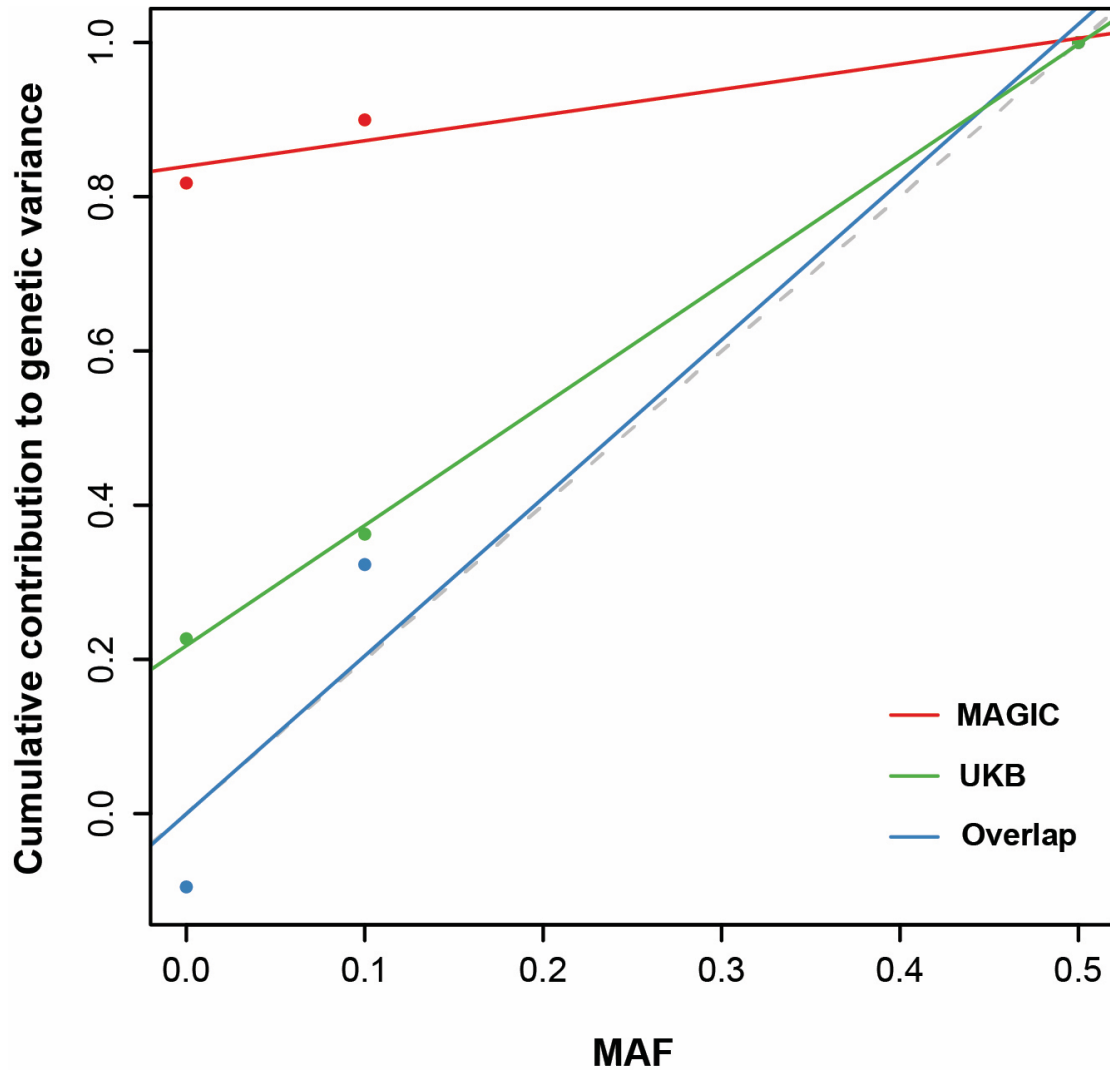

37

38 Supplementary Figure 7. Estimate of the cumulative contribution of variants, for HM, from  
 39 GREML-LDMS analysis. The dash line represents the expected contribution under a neutral  
 40 evolutionary model. The deviation from this dash line suggests that HM in UKB and MAGIC  
 41 are under negative selection. The first bin represents variants with MAF < 0.01 (cumulative  
 42 contribution to genetic variance for HM) when second bin shows all variants with MAF < 0.1.

43 The third MAF bin includes all variants in the dataset.

44

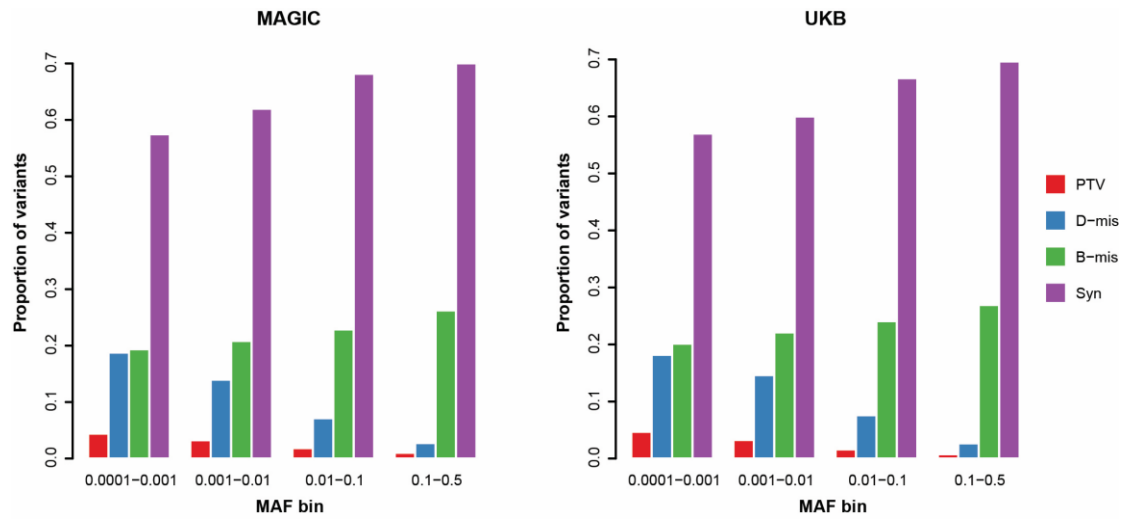

45

46 Supplementary Figure 8. Proportion of the variants categorized by annotations as a percentage

47 of the total number of variants in the four MAF bin.

48



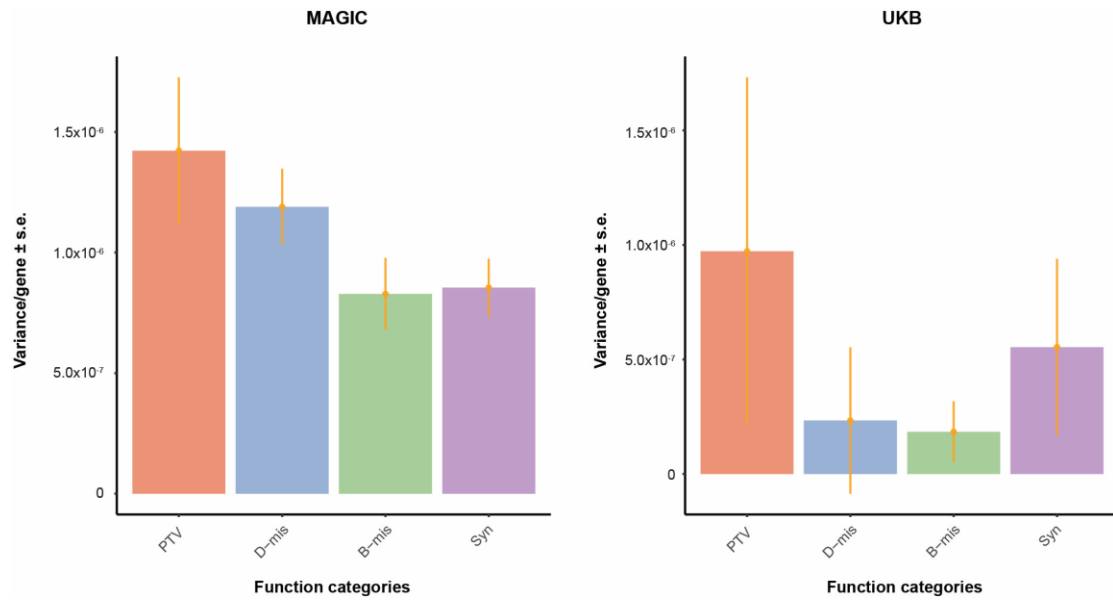

49

50 Supplementary Figure 9. Variance explained per genes (the estimate of genetic variance  
 51 divided by the number of genes in each bin) from burden heritability regression (BHR) with  
 52 the rare variant partitioned into four distinct categories according to the VEP putative effect of  
 53 the variant. Error bars indicate s.e.

54

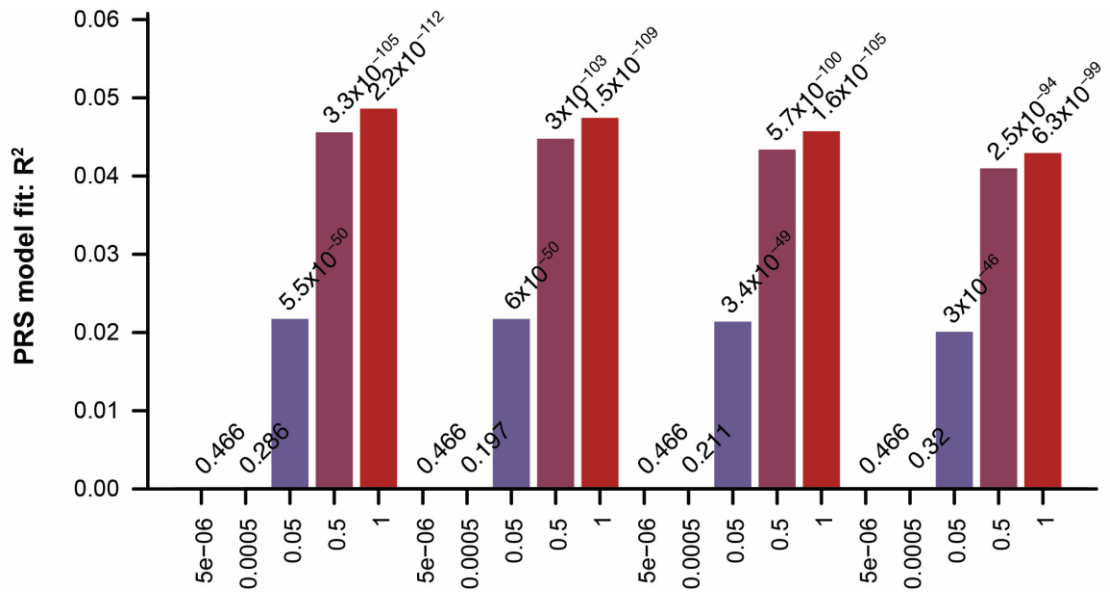

55

56 Supplementary Figure 10. Evaluation of predictive power of GRS derived from all common

57 variants on HM. GRSs were derived from MAGIC cohort by plink.

58

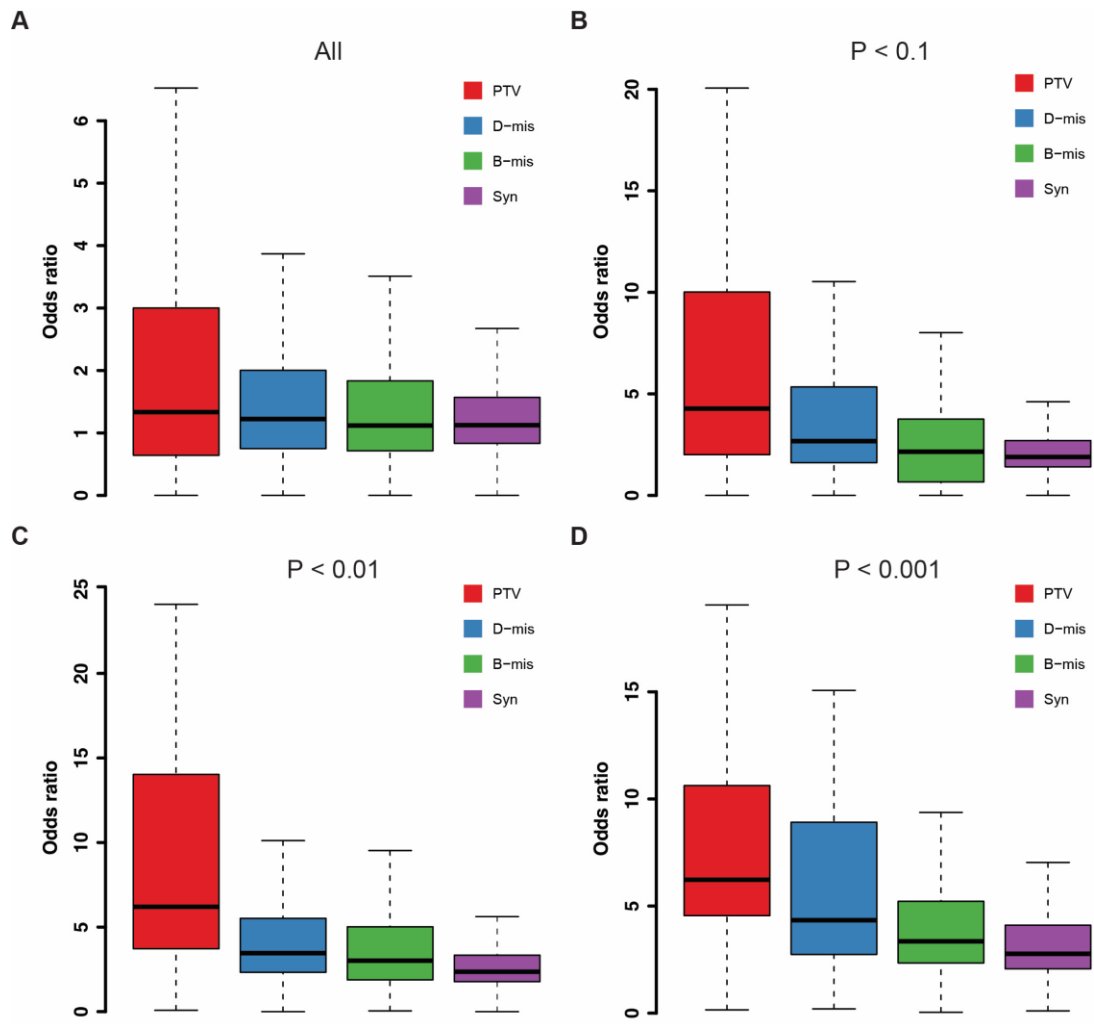

59

60 Supplementary Figure 11. Odds ratio of HM-associated gene in rare variant association study

61 under different  $P$  value threshold.

62

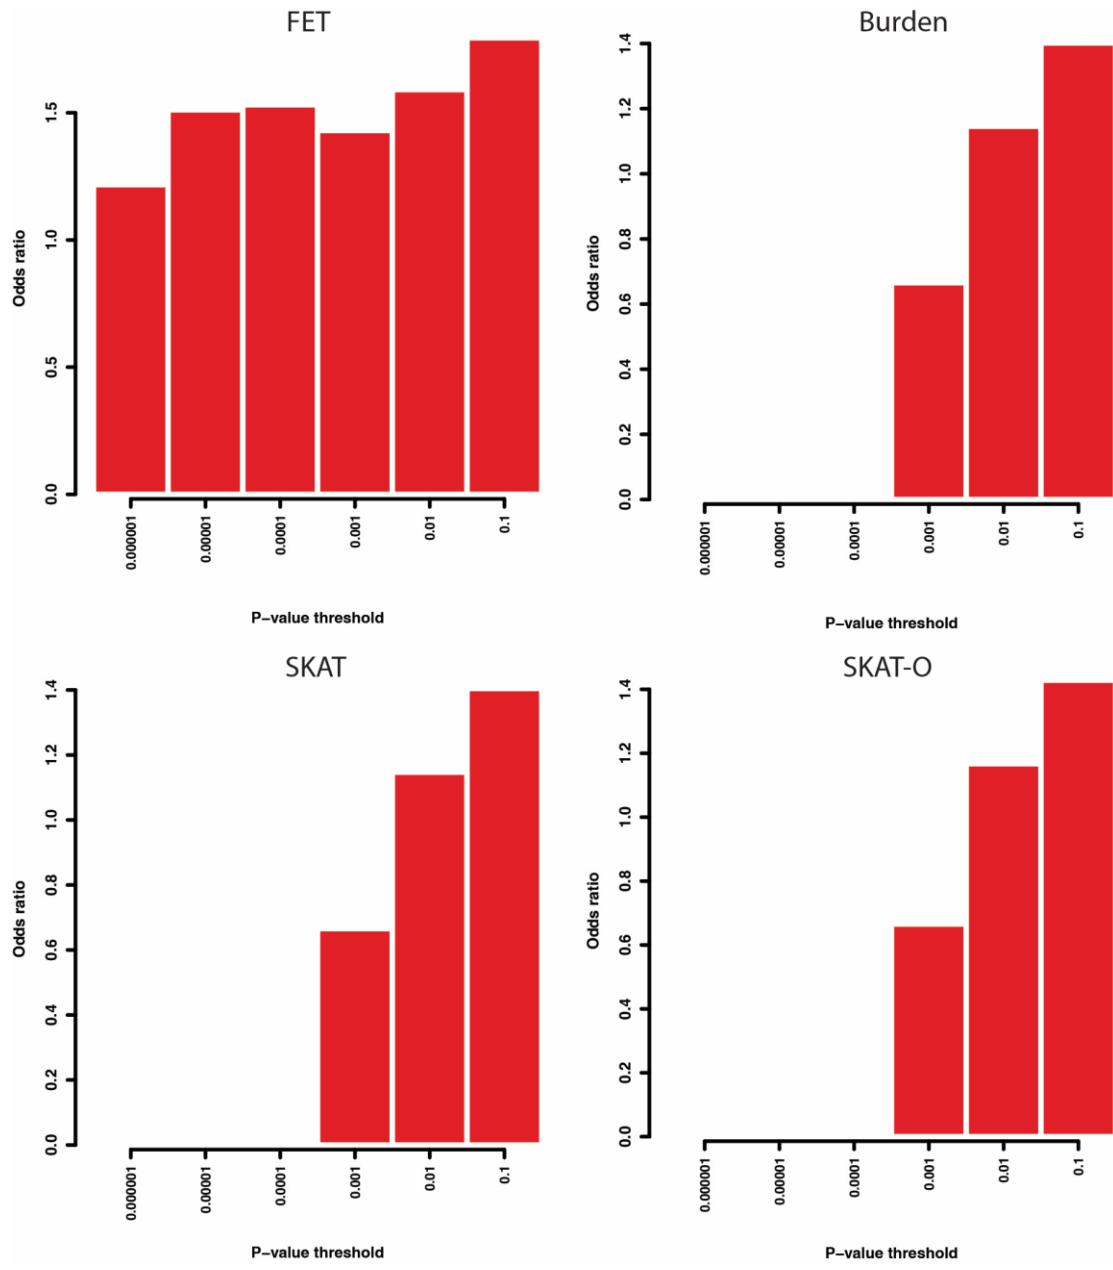

63

64 Supplementary Figure 12. Odds ratio for rvGRS model derived from HM-associated gene in

65 rare variant association study by using different Methods.

66

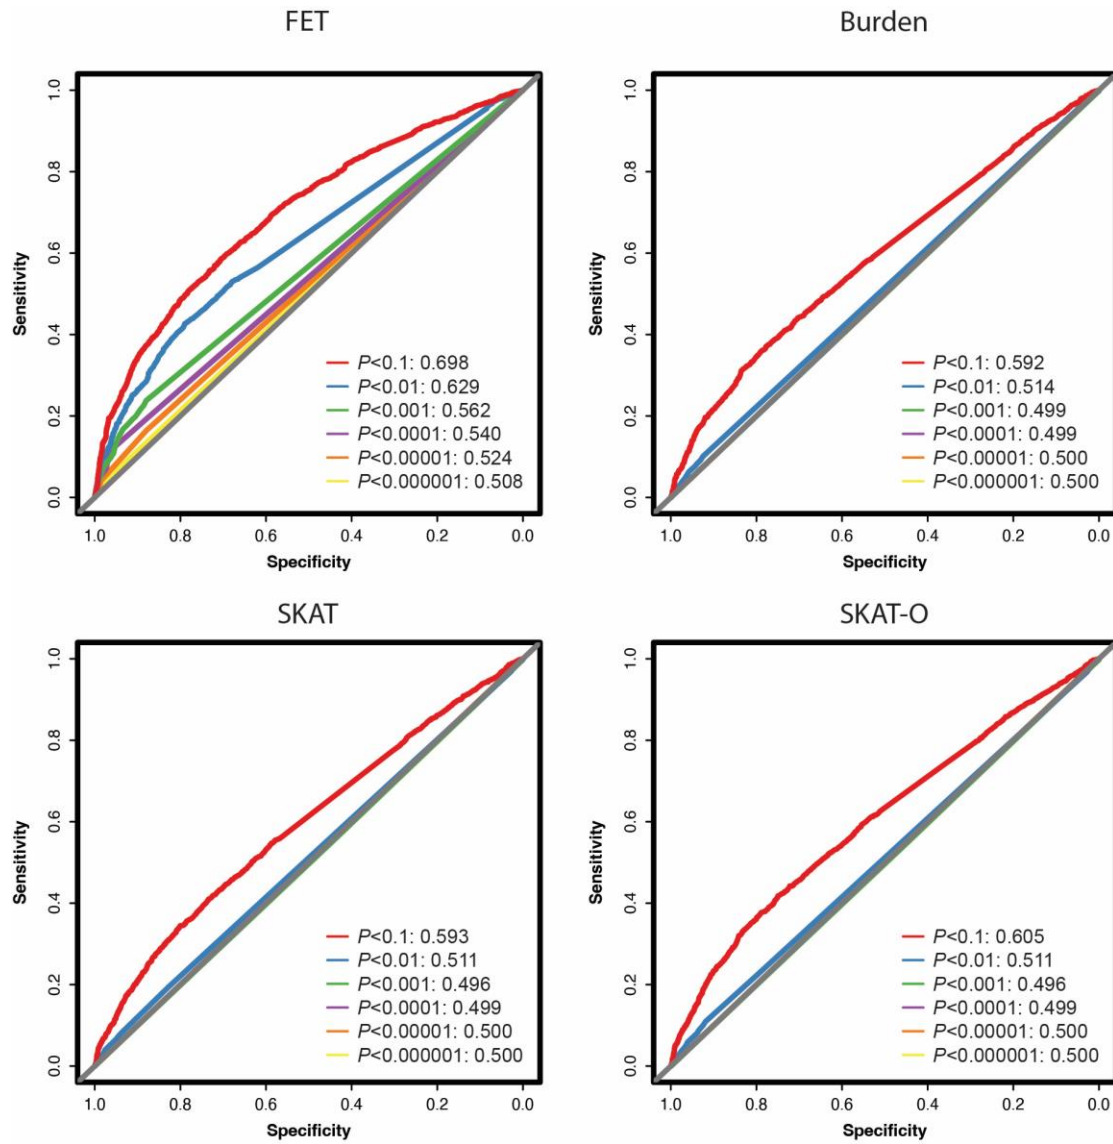

67

68 Supplementary Figure 13. ROC curve and AUC for rvGRS model derived from

69 HM-associated genes with rare PTV.

70

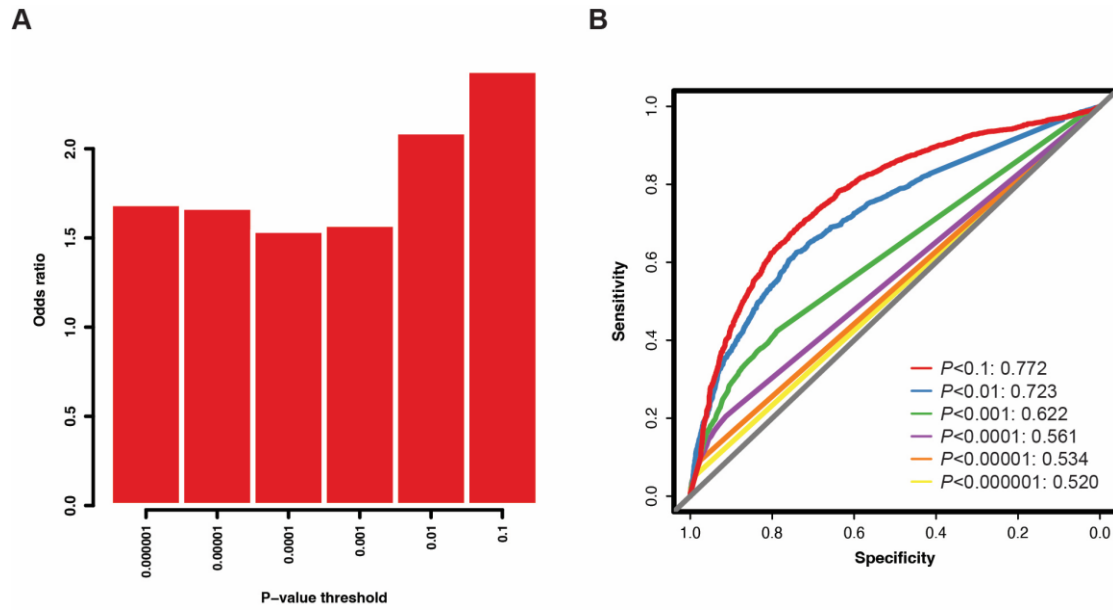

71

72 Supplementary Figure 14. Evaluated performance of rvGRS model derived from

73 HM-associated genes with rare D-mis selected by Fisher's exact test. (A) Odds ratio for

74 rvGRS model; (B) ROC curve and AUC for rvGRS model.

75

A

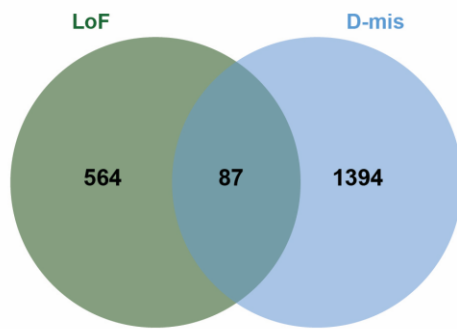

B

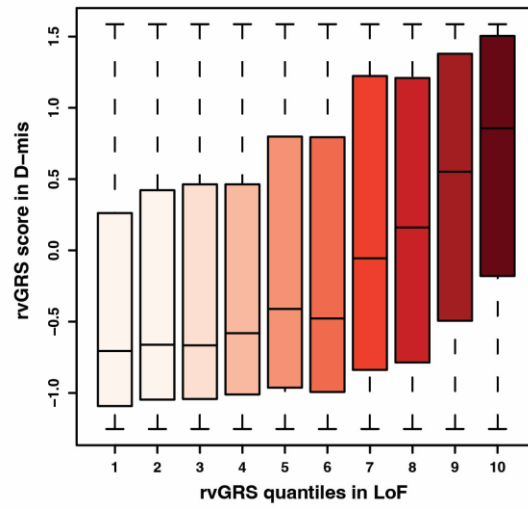

76

77 Supplementary Figure 15. Comparison of performance of rvGRS model with PTVs or D-mis.

78 (A) Comparison of the PTV and D-mis on the number of rare variant association study under

79 matched significance thresholds. (B) rvGRS in D-mis for each individual according to 10

80 groups of the validation dataset binned according to the quantiles of the rvGRS in PTVs.

81

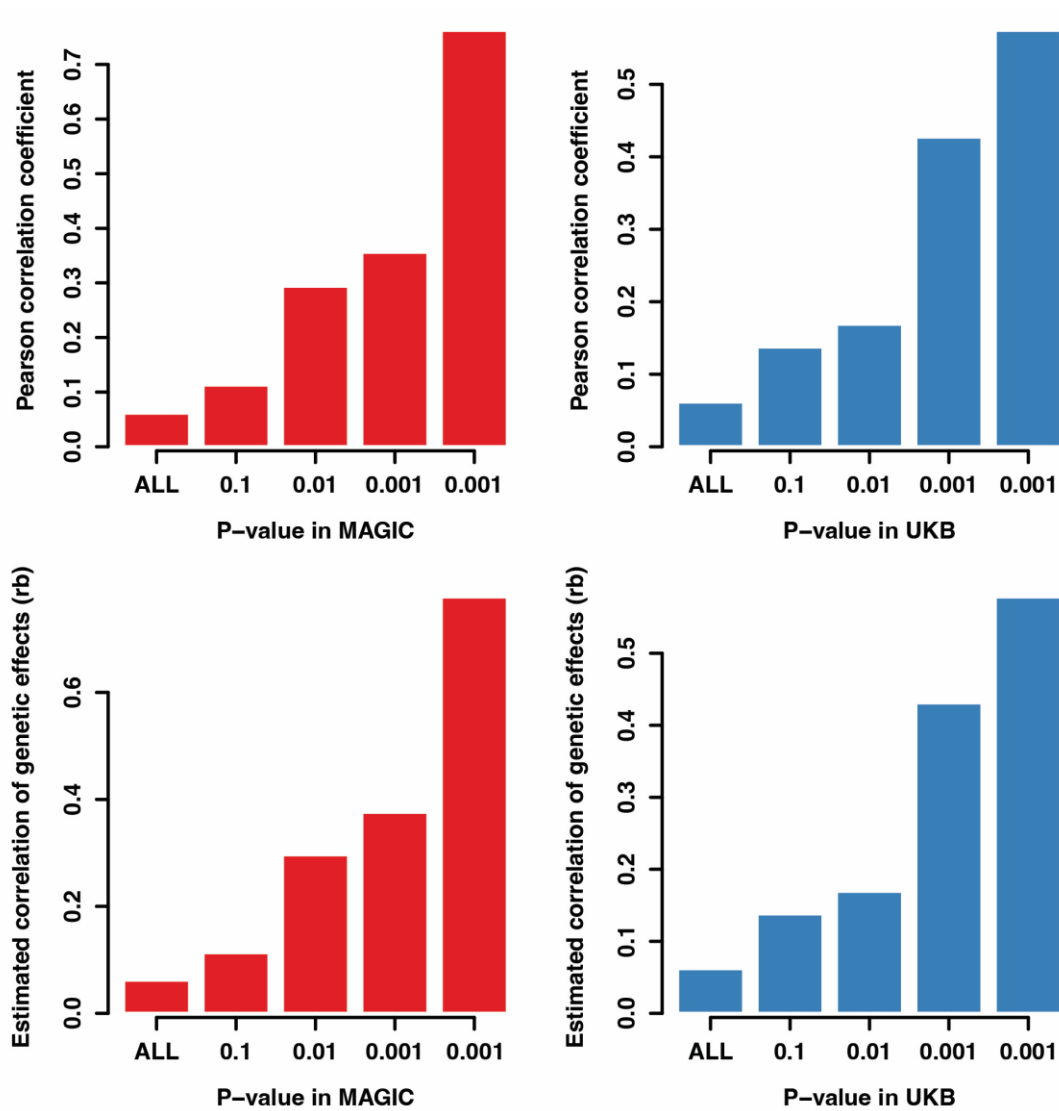

82

83 Supplementary Figure 16. Comparisons of the effect sizes (ORs) at different ExWAS P-value  
 84 thresholds in the MAGIC (left) and UKB (right). Bar plot displaying the Pearson correlation  
 85 coefficient (up panel) and rb (bottom pane) of log(ORs) at *P*-value threshold. The x-axis  
 86 indicates the P-value thresholds used to filter the variants to be included in the correlation  
 87 computation.

88



89 Supplementary Table 1. Variants identified from exome sequencing in MAGIC

| <b>Annotation</b>                  | <b>0.1-0.5</b> | <b>0.01-0.1</b> | <b>0.001-0.01</b> | <b>0.0001-0.001</b> |
|------------------------------------|----------------|-----------------|-------------------|---------------------|
| 3_prime_UTR_variant                | 2720           | 2567            | 5754              | 34517               |
| 5_prime_UTR_variant                | 1315           | 1177            | 2765              | 16393               |
| downstream_gene_variant            | 1025           | 918             | 2007              | 12070               |
| frameshift_variant                 | 55             | 113             | 440               | 3655                |
| inframe_deletion                   | 35             | 75              | 243               | 2038                |
| inframe_insertion                  | 23             | 30              | 94                | 616                 |
| intergenic_variant                 | 68             | 48              | 89                | 495                 |
| intron_variant                     | 14199          | 12028           | 24811             | 143689              |
| mature_miRNA_variant               | 2              | 6               | 14                | 78                  |
| missense_variant                   | 7569           | 8572            | 25940             | 182251              |
| non_coding_transcript_exon_variant | 759            | 560             | 1282              | 6696                |
| regulatory_region_variant          | 30             | 33              | 62                | 280                 |
| splice_acceptor_variant            | 12             | 5               | 46                | 329                 |
| splice_donor_variant               | 12             | 18              | 54                | 492                 |
| splice_region_variant              | 836            | 741             | 1669              | 10276               |
| start_lost                         | 11             | 8               | 48                | 302                 |
| stop_gained                        | 45             | 82              | 345               | 3403                |
| stop_lost                          | 6              | 5               | 14                | 106                 |
| stop_retained_variant              | 4              | 7               | 10                | 78                  |
| synonymous_variant                 | 9408           | 8460            | 18075             | 107530              |
| TF_binding_site_variant            | 4              | 3               | 5                 | 46                  |
| upstream_gene_variant              | 1294           | 1083            | 2230              | 13191               |
| Total                              | 39434          | 36541           | 86000             | 538560              |

90

91

92 Supplementary Table 2. Variants identified from exome sequencing in UKB

| <b>Annotation</b>                  | <b>0.1-0.5</b> | <b>0.01-0.1</b> | <b>0.001-0.01</b> | <b>0.0001-0.001</b> |
|------------------------------------|----------------|-----------------|-------------------|---------------------|
| 3_prime_UTR_variant                | 2659           | 2550            | 4079              | 13282               |
| 5_prime_UTR_variant                | 1612           | 1566            | 2657              | 8910                |
| downstream_gene_variant            | 683            | 656             | 1012              | 3350                |
| frameshift_variant                 | 33             | 82              | 278               | 1477                |
| inframe_deletion                   | 27             | 29              | 83                | 370                 |
| inframe_insertion                  | 23             | 34              | 66                | 285                 |
| intergenic_variant                 | 78             | 111             | 124               | 378                 |
| intron_variant                     | 35310          | 35795           | 53162             | 172392              |
| missense_variant                   | 9402           | 11604           | 24625             | 92030               |
| non_coding_transcript_exon_variant | 303            | 308             | 566               | 1560                |
| regulatory_region_variant          | 12             | 25              | 41                | 75                  |
| splice_acceptor_variant            | 16             | 21              | 90                | 418                 |
| splice_donor_variant               | 14             | 38              | 112               | 545                 |
| splice_region_variant              | 1993           | 1876            | 3124              | 10064               |
| start_lost                         | 11             | 17              | 39                | 179                 |
| stop_gained                        | 51             | 96              | 355               | 1837                |
| stop_lost                          | 9              | 12              | 18                | 70                  |
| stop_retained_variant              | 13             | 10              | 10                | 59                  |
| synonymous_variant                 | 11467          | 10705           | 16286             | 54847               |
| TF_binding_site_variant            | 4              | 2               | 2                 | 13                  |
| upstream_gene_variant              | 1017           | 1034            | 1778              | 5484                |
| <b>Total</b>                       | <b>64738</b>   | <b>66571</b>    | <b>108508</b>     | <b>367630</b>       |

93

94

95

96 Supplementary Table 3. Number of variants and LD properties (based on individual variant  
 97 LD score) of each of the four groupings of the MAGIC and UKB dataset according to the  
 98 allele frequency of the variant.

| MAF bin      | Number of SNPs in MAGIC | LD score properties in MAGIC |        |      | Number of SNPs in UKB | LD score properties in UKB |        |      |
|--------------|-------------------------|------------------------------|--------|------|-----------------------|----------------------------|--------|------|
|              |                         | Mean                         | Median | SD   |                       | Mean                       | Median | SD   |
| 0.0001-0.001 | 538560                  | 1.56                         | 1.33   | 1.25 | 367587                | 1.92                       | 1.39   | 2.08 |
| 0.001-0.01   | 85955                   | 1.61                         | 1.01   | 3.33 | 108493                | 1.75                       | 1.04   | 2.66 |
| 0.01-0.1     | 36466                   | 3.26                         | 1.58   | 4.37 | 66566                 | 3.82                       | 1.96   | 5.63 |
| 0.1-0.5      | 39425                   | 5.22                         | 3.7    | 4.82 | 64722                 | 6.89                       | 4.79   | 7.16 |

99

100

101 Supplementary Table 4. Grouping of functional consequences of the called sites

| <b>Consequence</b>               | <b>VEP Terms/annotation</b>                                                                                |
|----------------------------------|------------------------------------------------------------------------------------------------------------|
| Protein-truncating variant (PTV) | "frameshift_variant",<br>"splice_acceptor_variant", "splice_donor_variant",<br>"stop_gained", "start_lost" |
| Missense                         | "inframe_insertion", "inframe_deletion",<br>"missense_variant", "stop_lost"                                |
| Damaging missense (D-Mis)        | PolyPhen-2 "probably_damaging" & SIFT<br>"deleterious" & CADD > 15                                         |
| Benign missense (B-Mis)          | PolyPhen-2 "benign" & SIFT "tolerated" & CADD<br>< 15                                                      |
| Synonymous                       | "synonymous_variant"                                                                                       |

102

103

| Derivation Strategy    | Tuning Parameter(r2) | Tuning Parameter(p) | R2     | N variant in score | OR     | CI1    | CI2    | AUC   |
|------------------------|----------------------|---------------------|--------|--------------------|--------|--------|--------|-------|
| Pruning & Thresholding | 0.2                  | 0.000005            | 0.0001 | 5                  | 1.283  | 1.169  | 1.409  | 0.598 |
| Pruning & Thresholding | 0.2                  | 0.0005              | 0.0001 | 44                 | 1.452  | 1.321  | 1.596  | 0.621 |
| Pruning & Thresholding | 0.2                  | 0.05                | 0.0217 | 2464               | 3.77   | 3.375  | 4.214  | 0.851 |
| Pruning & Thresholding | 0.2                  | 0.5                 | 0.0456 | 22250              | 4.402  | 3.953  | 4.908  | 0.893 |
| Pruning & Thresholding | 0.2                  | 1                   | 0.0486 | 40491              | 4.991  | 4.45   | 5.606  | 0.895 |
| Pruning & Thresholding | 0.4                  | 0.000005            | 0.0001 | 5                  | 1.283  | 1.169  | 1.409  | 0.598 |
| Pruning & Thresholding | 0.4                  | 0.0005              | 0.0002 | 46                 | 1.454  | 1.322  | 1.599  | 0.624 |
| Pruning & Thresholding | 0.4                  | 0.05                | 0.0217 | 2583               | 3.606  | 3.238  | 4.019  | 0.85  |
| Pruning & Thresholding | 0.4                  | 0.5                 | 0.0448 | 23992              | 4.593  | 4.108  | 5.14   | 0.892 |
| Pruning & Thresholding | 0.4                  | 1                   | 0.0474 | 45132              | 4.73   | 4.228  | 5.299  | 0.894 |
| Pruning & Thresholding | 0.6                  | 0.000005            | 0.0001 | 5                  | 1.283  | 1.169  | 1.409  | 0.598 |
| Pruning & Thresholding | 0.6                  | 0.0005              | 0.0002 | 47                 | 1.459  | 1.326  | 1.605  | 0.625 |
| Pruning & Thresholding | 0.6                  | 0.05                | 0.0214 | 2670               | 3.623  | 3.251  | 4.042  | 0.848 |
| Pruning & Thresholding | 0.6                  | 0.5                 | 0.0434 | 25355              | 4.514  | 4.045  | 5.045  | 0.891 |
| Pruning & Thresholding | 0.6                  | 1                   | 0.0457 | 48878              | 4.699  | 4.2    | 5.263  | 0.893 |
| Pruning & Thresholding | 0.8                  | 0.000005            | 0.0001 | 5                  | 1.283  | 1.169  | 1.409  | 0.598 |
| Pruning & Thresholding | 0.8                  | 0.0005              | 0.0001 | 48                 | 1.422  | 1.295  | 1.562  | 0.623 |
| Pruning & Thresholding | 0.8                  | 0.05                | 0.0201 | 2792               | 3.525  | 3.163  | 3.932  | 0.843 |
| Pruning & Thresholding | 0.8                  | 0.5                 | 0.0410 | 26811              | 4.449  | 3.987  | 4.97   | 0.889 |
| Pruning & Thresholding | 0.8                  | 1                   | 0.0429 | 52624              | 4.572  | 4.091  | 5.116  | 0.89  |
| LDpred2                | na                   | 0.001               | 0.0055 | 35348              | 4.048  | 2.334  | 7.204  | 0.727 |
| LDpred2                | na                   | 0.003               | 0.0138 | 35348              | 5.684  | 3.283  | 10.066 | 0.774 |
| LDpred2                | na                   | 0.01                | 0.0238 | 35348              | 7.957  | 4.459  | 14.785 | 0.822 |
| LDpred2                | na                   | 0.03                | 0.0296 | 35348              | 10.523 | 5.649  | 20.866 | 0.856 |
| LDpred2                | na                   | 0.1                 | 0.0330 | 35348              | 20.637 | 8.836  | 58.935 | 0.882 |
| LDpred2                | na                   | 0.3                 | 0.0310 | 35348              | 16.456 | 8.674  | 33.474 | 0.888 |
| LDpred2                | na                   | 1                   | 0.0331 | 35348              | 28.051 | 11.251 | 90.239 | 0.894 |
| lassosum               | na                   | na                  | 0.0599 | 74550              | 1.549  | 1.404  | 1.709  | 0.640 |

107 Supplementary Table 6. The performance metrics of the GRS in the UKB testing cohorts

| <b>Models</b> | <b>OR per s.d. (95% CI), P</b> | <b>AUC</b> | <b>PRS threshold</b>     | <b>OR (95% CI), P</b>       | <b>Prevalence of HM</b> |
|---------------|--------------------------------|------------|--------------------------|-----------------------------|-------------------------|
| cvGRS         | 1.78 (1.69-1.88), 2.14e-105    | 0.662      | Top 20% versus other 80% | 2.84 (2.54-3.19), 4.70e-72  | 0.41                    |
|               |                                |            | Top 10% versus other 90% | 3.49 (3.01-4.04), 1.86e-62  | 0.49                    |
|               |                                |            | Top 5% versus other 95%  | 3.67 (3.00-4.48), 1.96e-37  | 0.52                    |
|               |                                |            | Top 2% versus other 980% | 5.64 (4.09-7.83), 2.36e-28  | 0.63                    |
|               |                                |            | Top 1% versus other 99%  | 8.47 (5.20-14.22), 1.92e-21 | 0.72                    |
| rvGRS         | 1.11 (1.06-1.16), 1.42e-6      | 0.528      | Top 20% versus other 80% | 1.35 (1.10-1.41), 0.0003    | 0.27                    |
|               |                                |            | Top 10% versus other 90% | 1.36 (1.16-1.59), 0.0001    | 0.29                    |
|               |                                |            | Top 5% versus other 95%  | 1.53 (1.24-1.89), 0.00008   | 0.32                    |
|               |                                |            | Top 2% versus other 980% | 1.85 (1.33-2.56), 0.00016   | 0.37                    |
|               |                                |            | Top 1% versus other 99%  | 1.42 (0.86-2.28), 0.132     | 0.31                    |
| ExGRS         | 1.46 (1.41-1.52), 2.35e-82     | 0.657      | Top 20% versus other 80% | 2.78 (2.48-3.11), 1.81e-68  | 0.41                    |
|               |                                |            | Top 10% versus other 90% | 2.74 (2.36-3.17), 3.55e-40  | 0.43                    |
|               |                                |            | Top 5% versus other 95%  | 2.03 (1.65-2.49), 2.28e-11  | 0.38                    |
|               |                                |            | Top 2% versus other 980% | 2.43 (1.77-3.33), 2.85e-11  | 0.43                    |
|               |                                |            | Top 1% versus other 99%  | 3.26 (2.09-5.10), 8.94e-9   | 0.51                    |

108

109
