# Supplementary material for: Exome-wide genetic risk score (ExGRS) to predict high myopia across multi-ancestry populations
Source: PubMed Central journal article supplement — Commun Med (Lond). 2024 Dec 30;4:280. doi: 10.1038/s43856-024-00718-1 (PMC11685959; doi:10.1038/s43856-024-00718-1), 2024-12-30
Supplement: 43856_2024_718_MOESM3_ESM.pdf [file 43856_2024_718_MOESM3_ESM.pdf]

Supplementary Data 1: Source data underlying Fig. 1 and Fig. 2.
